# Supplementary material for: A quinary layer transition metal oxide of NaNi1/4Co1/4Fe1/4Mn1/8Ti1/8O2 as a high-rate-capability and long-cycle-life cathode material for rechargeable sodium ion batteries
Source: Royal Society of Chemistry journal article supplement (doi:10.1039/c5cc06585b), 2015-01-01
Supplement: c5cc06585b1.pdf [file c5cc06585b1.pdf]

---

# A Quinary Layer Transition Metal Oxide of $\text{NaNi}_{1/4}\text{Co}_{1/4}\text{Fe}_{1/4}\text{Mn}_{1/8}\text{Ti}_{1/8}\text{O}_2$ as High Rate Capability and Long Cycle Life Cathode Material for Rechargeable Sodium Ion Batteries

Ji-Li Yue,<sup>a</sup> Wen-Wen Yin,<sup>a</sup> Min-Hui Cao,<sup>a</sup> Shadike Zulipiya,<sup>a</sup> Yong-Ning Zhou<sup>\*b</sup> and Zheng-Wen Fu<sup>\*a</sup>

<sup>a</sup> Shanghai Key Laboratory of Molecular Catalysts and Innovative Materials, Department of Chemistry & Laser Chemistry Institute, Fudan University Shanghai, 200433, P.R. China. E-mail: [zwfu@fudan.edu.cn](mailto:zwfu@fudan.edu.cn)

<sup>b</sup> Department of Materials Science, Fudan University, Shanghai, 200433, P.R. China. E-mail: [ynzhou@fudan.edu.cn](mailto:ynzhou@fudan.edu.cn)

## Electronic Supplementary Information (ESI)

## Experimental Section

### Material Synthesis

$\text{NaNi}_{1/4}\text{Co}_{1/4}\text{Fe}_{1/4}\text{Mn}_{1/8}\text{Ti}_{1/8}\text{O}_2$  (NCFMT) was synthesized by a conventional solid state reaction method. Stoichiometric amounts of  $\text{Na}_2\text{CO}_3$  (99.95% Alfa Aesar),  $\text{TiO}_2$  (99.9% Sigma-Aldrich),  $\text{Fe}_2\text{O}_3$  (99.99% Alfa Aesar),  $\text{CoO}$  (99.995% Alfa Aesar),  $\text{Mn}_2\text{O}_3$  (99.99% Alfa Aesar) and  $\text{NiO}$  (99.99% Sigma-Aldrich) powder were mixed by a mortar and pestle, then the mixture was pressed into a pellet. NCFMT was synthesized by sintering the pellet at 800 °C in an oxygen gas flow for 12 h. The pellet was naturally cooled to room temperature and transferred immediately into an Ar-filled glovebox.

### Material Characterization

The morphology of the product was characterized by field mission scanning electron microscopy (SEM, Cambridge S-360). Powder X-ray diffraction (XRD) patterns were collected on an X-ray diffractometer (BrukerD8 Advance, Germany) with  $\text{Cu-K}\alpha$  radiation ( $\lambda = 0.1540$  nm) at 40 kV, 40 mA. Data were obtained over the  $2\theta$  range of 10–90° for as-prepared materials and 10–70° for electrodes with a scan rate of 1°  $\text{min}^{-1}$ . XRD refinement was conducted by using the Rietveld method using GSAS program. High resolution transmission electron microscopy (HRTEM) and selected-area electron diffraction (SAED) were carried out on a JEOL JEM-2100F transmission electron microscope at an acceleration voltage of 200 kV. X-ray absorption spectroscopy (XAS) was performed at beamline 14W of Shanghai Synchrotron Radiation Facility. Ni, Co, Fe, Mn, Ti K-edge XAS was collected in transmission mode. The XAS data was processed using Athena and Artemis software packages.<sup>1,2</sup>

### Electrochemistry

The working electrode was prepared by spreading the slurry of 70 wt % NCFMT, 20 wt % carbon black, and 10 wt % polyvinylidene fluoride (PVDF, Sigma-Aldrich) on the aluminum foil. The electrodes were dried at 120°C for 12 h, and punched to small circular pieces with a diameter of 14 mm, the loading of the active material is about 1.8–2.1  $\text{g cm}^{-2}$ . Electrochemical cells were assembled in an Ar-filled glovebox (MBraun, Germany). The electrolytes consisted of 1 M  $\text{NaClO}_4$  (Alfa-Aesar) in a nonaqueous solution of ethylene carbonate (EC, Alfa-Aesar) and propylene carbonate (PC, Alfa-Aesar) with a volume ratio of 1:1, 5wt% fluoroethylene carbonate (FEC) were added, according to the literature.<sup>3,4</sup> Galvanostatic charge-discharge measurements were carried out at room temperature on a Land CT 2001A battery test system by using coin cells. The charge-discharge condition for the rate experiment is that galvanostatic charge-discharge at the C-rates of 0.1C, 0.2C, 1C, 2C, 4C, 10C, 20C, 30C, 60C and 120C (1C=130mAh/g) between the potential range of 2.0–4.1V vs.  $\text{Na}^+/\text{Na}$ . The coin cell were assembled with pure sodium foil as the counter electrode, and a glass fiber (Whatman GF/F) as the separator. The current densities and capacities of electrodes were calculated on the basis of the weight of active materials.

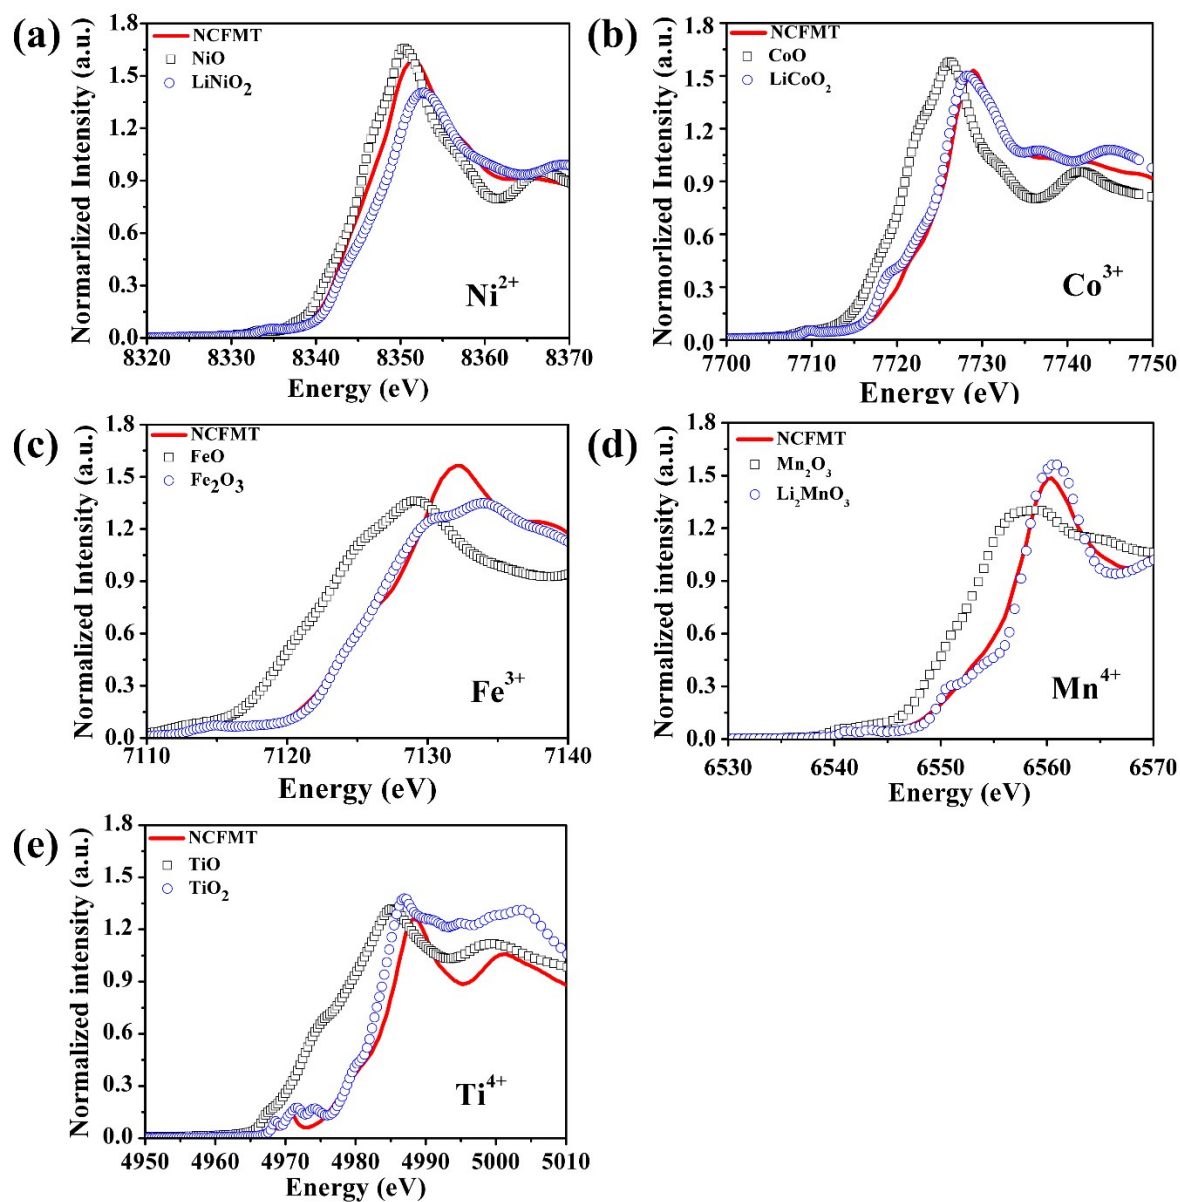

**Fig. S1** XANES spectra at the (a) Ni, (b) Co, (c) Fe, (d) Mn and (e) Ti K-edges of pristine NCFMT and corresponding metal oxides references.

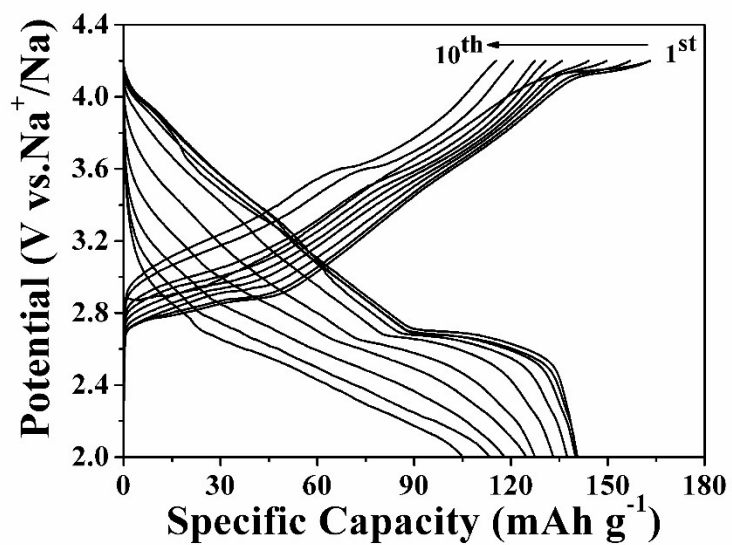

**Fig. S2** The charge-discharge curves of NCFMT at a current rate of 0.1C (13 mA g<sup>-1</sup>) in the potential range of 2.0 – 4.2V versus Na<sup>+</sup>/Na.

**Table S1** Comparison of the electrochemical performances of layered cathode materials for sodium ion batteries.

|            | Electrode materials                                                                                    | Voltage range  | Profile shapes | Initial capacity @0.1C (mAh/g) | Cycle retention (rate number retention) | Capacity @ high rate (>1C) (mAh/g) | Ref.             |
|------------|--------------------------------------------------------------------------------------------------------|----------------|----------------|--------------------------------|-----------------------------------------|------------------------------------|------------------|
| unary      | NaNiO <sub>2</sub>                                                                                     | 1.25-3.75      | step           | 125                            | 0.1C 20 93%                             | No Info.                           | 5                |
|            | NaFeO <sub>2</sub>                                                                                     | 1.5-3.6        | plateau        | 82                             | No Info.                                | No Info.                           | 6                |
|            | NaTiO <sub>2</sub>                                                                                     | 0.6-1.6        | step           | 152                            | 0.1C 60 98%                             | 2C 78                              | 7                |
|            | NaCoO <sub>2</sub>                                                                                     | 2.0-3.8        | step           | 116                            | No Info.                                | 240C 33                            | 8                |
|            | $\alpha$ -NaMnO <sub>2</sub>                                                                           | 2.0-3.8        | step           | 187                            | 0.1C 20 70%                             | No Info.                           | 9                |
|            | $\beta$ -NaMnO <sub>2</sub>                                                                            | 2.0-4.2        | step           | No Info.                       | 0.05C 100 80%                           | 10C 90                             | 10               |
|            | NaCrO <sub>2</sub>                                                                                     | 2.0-3.6        | smooth         | 112                            | 0.5C 50 83.3%                           | 20C 15                             | 11               |
|            | NaCrO <sub>2</sub> /C                                                                                  | 2.0-3.6        | smooth         | 121                            | 1C 300 90%                              | 105C 100                           | 11               |
| binary     | NaNi <sub>1/2</sub> Mn <sub>1/2</sub> O <sub>2</sub>                                                   | 2.2-3.8        | step           | No Info.                       | 0.2C 50 70%                             | 1C 105                             | 12               |
|            | NaFe <sub>1/2</sub> Co <sub>1/2</sub> O <sub>2</sub>                                                   | 2.5-4.0        | step           | 160                            | 0.1C 50 85%                             | 30C 90                             | 13               |
|            | NaNi <sub>1/2</sub> Ti <sub>1/2</sub> O <sub>2</sub>                                                   | 2.0-4.0        | smooth         | 102                            | 0.2C 100 93%                            | 10C 20                             | 14               |
|            | NaFe <sub>1/2</sub> Mn <sub>1/2</sub> O <sub>2</sub>                                                   | 1.5-4.2        | step           | 110                            | 0.1C 20 89%                             | No Info.                           | 15               |
| ternary    | Na <sub>0.45</sub> Ni <sub>0.22</sub> Co <sub>0.11</sub> Mn <sub>0.66</sub> O <sub>2</sub>             | 2.0-4.3        | step           | 148                            | 0.1 C 100 82%                           | 5C 45                              | 16               |
|            | Na <sub>2/3</sub> Ni <sub>1/3</sub> Mn <sub>2/3-x</sub> Ti <sub>x</sub> O <sub>2</sub>                 | 2.5-4.5        | step           | 127                            | 0.05C 10 94%                            | 2C 90                              | 17               |
|            | Na <sub>0.5</sub> [Ni <sub>0.23</sub> Fe <sub>0.13</sub> Mn <sub>0.63</sub> ]O <sub>2</sub>            | 1.5-4.6        | step           | 210                            | 0.1C 70 75%                             | 5C 48                              | 18               |
|            | NaNi <sub>0.25</sub> Fe <sub>0.5</sub> Mn <sub>0.25</sub> O <sub>2</sub>                               | 2.1-3.9        | smooth         | 140                            | 0.5C 50 92%                             | 10C 89                             | 19               |
|            | NaNi <sub>0.33</sub> Mn <sub>0.33</sub> Co <sub>0.33</sub> O <sub>2</sub>                              | 2.0-3.75       | step           | 120                            | 0.1C 50 96%                             | 1C 80                              | 20               |
|            | Na[Ni <sub>1/3</sub> Fe <sub>1/3</sub> Mn <sub>1/3</sub> ]O <sub>2</sub>                               | 2.0-4.0        | smooth         | 122                            | 0.1C 150 76%                            | 1C 95                              | 21               |
|            | NaNi <sub>0.4</sub> Fe <sub>0.2</sub> Mn <sub>0.4</sub> O <sub>2</sub>                                 | 2.0-4.0        | smooth         | 131                            | 0.05C 30 95%                            | 10C 80                             | 22               |
|            | NaNi <sub>1/3</sub> Co <sub>1/3</sub> Fe <sub>1/3</sub> O <sub>2</sub>                                 | 2.0-4.2        | step           | 165                            | 0.05C 20 90%                            | 30C 80                             | 23               |
|            | NaFe <sub>0.2</sub> Ni <sub>0.4</sub> Ti <sub>0.4</sub> O <sub>2</sub>                                 | 2.6-3.75       | smooth         | 120                            | 0.1C 30 83%                             | No Info.                           | 24               |
|            | Na <sub>0.67</sub> [Mn <sub>0.65</sub> Co <sub>0.2</sub> Ni <sub>0.15</sub> ]O <sub>2</sub>            | 2.0-4.4        | step           | 141                            | 0.2C 50 88%                             | 8C 55                              | 25               |
| quaternary | NaNi <sub>0.25</sub> Fe <sub>0.25</sub> Co <sub>0.25</sub> Mn <sub>0.25</sub> O <sub>2</sub>           | 1.9-4.3        | step           | 183                            | 0.1C 20 92%                             | No Info.                           | 26               |
|            | Na[Ni <sub>0.4</sub> Fe <sub>0.2</sub> Mn <sub>0.2</sub> Ti <sub>0.2</sub> ]O <sub>2</sub>             | 2.0-4.2        | smooth         | 145                            | 0.1C 200 84%                            | 2C 45                              | 27               |
| quinary    | <b>NaNi<sub>1/4</sub>Co<sub>1/4</sub>Fe<sub>1/4</sub>Mn<sub>1/8</sub>Ti<sub>1/8</sub>O<sub>2</sub></b> | <b>2.0-4.1</b> | <b>smooth</b>  | <b>128</b>                     | <b>4C 300 90%</b>                       | <b>30C 62</b>                      | <b>This work</b> |

**Table S2** Structural parameters of O3-type  $\text{NaNi}_{1/4}\text{Co}_{1/4}\text{Fe}_{1/4}\text{Mn}_{1/8}\text{Ti}_{1/8}\text{O}_2$  refined by Rietveld analysis

| Space Group = $R-3m$                                     |      |     |     |        |           |  |
|----------------------------------------------------------|------|-----|-----|--------|-----------|--|
| $a = b = 2.959 \text{ \AA}$ and $c = 15.956 \text{ \AA}$ |      |     |     |        |           |  |
| atom                                                     | site | $x$ | $y$ | $z$    | occupancy |  |
| Na                                                       | 3b   | 0.0 | 0.0 | 0.0    | 1.00      |  |
| Ni                                                       | 3a   | 0.0 | 0.0 | 0.5    | 0.25      |  |
| Co                                                       | 3a   | 0.0 | 0.0 | 0.5    | 0.25      |  |
| Fe                                                       | 3a   | 0.0 | 0.0 | 0.5    | 0.25      |  |
| Mn                                                       | 3a   | 0.0 | 0.0 | 0.5    | 0.125     |  |
| Ti                                                       | 3a   | 0.0 | 0.0 | 0.5    | 0.125     |  |
| O                                                        | 6c   | 0.0 | 0.0 | 0.2253 | 1.00      |  |

$$R_{\text{wp}} = 12.10, \chi^2 = 7.475$$

**Table S3** EDS report obtained from TEM of the as prepared material

| Element | Line Type | $k$ Factor | Absorption Correction | $Wt\%$ | $Wt\%$ Sigma | Atomic % |
|---------|-----------|------------|-----------------------|--------|--------------|----------|
| O       | K series  | 0.843      | 1.00                  | 28.39  | 0.56         | 51.62    |
| Na      | K series  | 0.501      | 1.00                  | 15.08  | 0.35         | 19.08    |
| Ti      | K series  | 0.459      | 1.00                  | 6.35   | 0.23         | 3.86     |
| Mn      | K series  | 0.490      | 1.00                  | 6.79   | 0.26         | 3.60     |
| Fe      | K series  | 0.490      | 1.00                  | 14.46  | 0.35         | 7.53     |
| Co      | K series  | 0.510      | 1.00                  | 15.63  | 0.38         | 7.72     |
| Ni      | K series  | 0.504      | 1.00                  | 13.30  | 0.36         | 6.59     |
| Total:  |           |            |                       | 100.00 |              | 100.00   |

The ratio (Ni:Co:Fe:Mn:Ti = 6.59:7.72:7.53:3.60:3.86: = 2:2:2:1:1) agrees well with the target component

$\text{NaNi}_{1/4}\text{Co}_{1/4}\text{Fe}_{1/4}\text{Mn}_{1/8}\text{Ti}_{1/8}\text{O}_2$ .

**References**

- 1 Newville, M. *J. Synchrotron Radiat.*, 2001, **8**, 322-324.
- 2 B. Ravel and M. Newville, *J. Synchrotron Radiat.*, 2005, **12**, 537-541.
- 3 S. Komaba, T. Ishikawa, N. Yabuuchi, W. Murata, A. Ito and Y. Ohsawa, *ACS Appl. Mater. Interfaces*, 2011, **3**, 4165-4168.
- 4 B. Mortemard de Boisse, J. H. Cheng, D. Carlier, M. Guignard, C. J. Pan, S. Bordere, D. Filimonov, C. Drathen, E. Suard, B. J. Hwang, A. Wattiaux and C. Delmas, *J. Mater. Chem. A*, 2015, **3**, 10976-10989.
- 5 X. H. Ma, H. L. Chen and G. Ceder, *J. Electrochem. Soc.*, 2011, **158**, A1307-A1312.
- 6 N. Yabuuchi, H. Yoshida and S. Komaba, *Electrochemistry*, 2012, **80**, 716-719.
- 7 D. Wu, X. Li, B. Xu, N. Twu, L. Liu and G. Ceder. *Energy Environ. Sci.*, 2015, **8**, 195-202.
- 8 T. Shibata, Y. Fukuzumi, W. Kobayashi and Yutaka Moritomo, *Sci. Rep.*, 2015, **5**, 9006.
- 9 X. H. Ma, H. L. Chen and G. Ceder, *J. Electrochem. Soc.*, 2011, **158**, A1307-A1312.
- 10 J. Billaud, R. J. Clement, A. R. Armstrong, J. Canales-Vazquez, P. Rozier, C. P. Grey and P. G. Bruce, *J. Am. Chem. Soc.*, 2014, **136**, 17243-17248.
- 11 C. Y. Yu, J. S. Park, H. G. Jung, K. Y. Chung, D. Aurbach, Y. K. Sun, and S. T. Myung, *Energy Environ. Sci.*, 2015, **8**, 2019-2026.
- 12 S. Komaba, N. Yabuuchi, T. Nakayama, A. Ogata, T. Ishikawa and I. Nakai, *Inorg. Chem.*, 2012, **51**, 6211-6220.
- 13 H. Yoshida, N. Yabuuchi and S. Komaba, *Electrochem. Commun.*, 2013, **34**, 60-63.
- 14 H. J. Yu, S. H. Guo, Y. B. Zhu, M. Ishida and H. S. Zhou, *Chem. Commun.*, 2014, **50**, 457-459.
- 15 N. Yabuuchi, M. Kajiyama, J. Iwatat, H. Nishikawa, S. Hitomi, R. Okuyama, R. Usui, Y. Yamada and S. Komaba, *Nat. Mater.* 2012, **11**, 512-517.
- 16 D. Buchholz, L. Gomes Chagas, M. Winter and S. Passerini, *Electrochimica Acta*, 2013, **110**, 208-213.
- 17 D. D. Yuan, X. H. Hu, J. F. Qian, F. Pei, F. Y. Wu, R. J. Mao, X. P. Ai, H. X. Yang and Y. L. Cao, *Electrochimica Acta*, 2014, **116**, 300-305.
- 18 I. Hasa, D. Buchholz, S. Passerini, B. Scrosati and J. Hassoun, *Adv. Energy Mater.*, 2014, **4**, 1400083.
- 19 S. M. Oh, S. T. Myung, C. S. Yoon, J. Lu, J. Hassoun, B. Scrosati, K. Amine and Y. K. Sun, *Nano Lett.*, 2014, **4**, 1620-1626.

- 20 M. Sathiya, K. Hemalatha, K. Ramesha, J.-M. Tarascon and A. S. Prakash, *Chem. Mater.*, 2012, **24**, 1846–1853.
- 21 D. Kim, E. Lee, M. Slater, W. Lu, S. Rood, and C.S. Johnson, *Electrochem. Commun.*, 2012, **18**, 66–69.
- 22 D. D. Yuan, Y. X. Wang, Y. L. Cao, X. P. Ai and H. X. Yang, *ACS Appl. Mater. Interfaces*, 2015, **7**, 8585–8591.
- 23 P. Vassilaras, A. J. Toumar and G. Ceder, *Electrochem. Commun.*, 2014, **38**, 79–81.
- 24 G. Singh, F. Aguesse, L. Otaegui, E. Goikolea, E. Gonzalo, J Segalini and T. Rojo. *J. Power Sources*, 2015, **273**, 333–339.
- 25 D. D. Yuan, W. He, F. Pei, F. Y. Wu, Y. Wu, J. F. Qian, Y. L. Cao, X. P. Ai and H. X. Yang, *J. Mater. Chem. A*, 2013, **1**, 3895–3899.
- 26 X. Li, D. Wu, Y. N. Zhou, L. Liu, X. Q. Yang and G. Ceder, *Electrochem. Commun.*, 2014, **49**, 51–54.
- 27 X. Sun, Y. Jin, C. Y. Zhang, J. W. Wen, Y. Shao, Y. Zang and C. H. Chen, *J. Mater. Chem. A*, 2014, **2**, 17268–17271.
